# Supplementary material for: Communication around HPV vaccination for adolescents in low- and middle-income countries: a systematic scoping overview of systematic reviews
Source: PubMed Central journal article supplement (PMC6670236; doi:10.1186/s13643-019-1100-y), 2019-08-01
Supplement: 13643_2019_1100_MOESM2_ESM.pdf [file 13643_2019_1100_MOESM2_ESM.pdf]

Additional file 2: The full search strategy

[https://www.epistemonikos.org/advanced\\_search?q=\(title:\(\(title:\(\(HPV OR papilloma\\* OR "cervical cancer" OR "cervical cancers" OR "cervic cancer" OR "cervic cancers" OR "cervix cancer" OR "cervix cancers" OR "cervical neoplasm" OR "cervical neoplasms" OR "cervic neoplasm" OR "cervic neoplasms" OR "cervix neoplasm" OR "cervix neoplasms"\) AND \(vacc\\* OR immun\\* OR communic\\* OR educat\\* OR inform\\* OR campaign\\*\)\) OR abstract:\(\(HPV OR papilloma\\* OR "cervical cancer" OR "cervical cancers" OR "cervic cancer" OR "cervic cancers" OR "cervix cancer" OR "cervix cancers" OR "cervical neoplasm" OR "cervical neoplasms" OR "cervic neoplasm" OR "cervic neoplasms" OR "cervix neoplasm" OR "cervix neoplasms"\) AND \(vacc\\* OR immun\\* OR communic\\* OR educat\\* OR inform\\* OR campaign\\*\)\)\)\) OR abstract:\(\(title:\(\(HPV OR papilloma\\* OR "cervical cancer" OR "cervical cancers" OR "cervic cancer" OR "cervic cancers" OR "cervix cancer" OR "cervix cancers" OR "cervical neoplasm" OR "cervical neoplasms" OR "cervic neoplasm" OR "cervic neoplasms" OR "cervix neoplasm" OR "cervix neoplasms"\) AND \(vacc\\* OR immun\\* OR communic\\* OR educat\\* OR inform\\* OR campaign\\*\)\) OR abstract:\(\(HPV OR papilloma\\* OR "cervical cancer" OR "cervical cancers" OR "cervic cancer" OR "cervic cancers" OR "cervix cancer" OR "cervix cancers" OR "cervical neoplasm" OR "cervical neoplasms" OR "cervic neoplasm" OR "cervic neoplasms" OR "cervix neoplasm" OR "cervix neoplasms"\) AND \(vacc\\* OR immun\\* OR communic\\* OR educat\\* OR inform\\* OR campaign\\*\)\)\)\)&protocol=no&classification=systematic-review&min\\_year=2007&max\\_year=2017](https://www.epistemonikos.org/advanced_search?q=(title:((title:((HPV OR papilloma* OR )
