# Supplementary material for: Communication around HPV vaccination for adolescents in low- and middle-income countries: a systematic scoping overview of systematic reviews
Source: PubMed Central journal article supplement (PMC6670236; doi:10.1186/s13643-019-1100-y), 2019-08-01
Supplement: 13643_2019_1100_MOESM3_ESM.pdf [file 13643_2019_1100_MOESM3_ESM.pdf]

Additional file 3: List of excluded reviews assessed in full-text with reasons for exclusion

| <b>Review</b>                                | <b>Reason for exclusion</b>                           |
|----------------------------------------------|-------------------------------------------------------|
| <b>de Andrade, 2010 [1]</b>                  | Not written in English, Norwegian, Swedish or Danish. |
| <b>Baroy et al., 2016 [2]</b>                | Does not focus on HPV vaccination.                    |
| <b>Ben Hadj Yahia et al., 2015 [3]</b>       | Does not focus on communication.                      |
| <b>Bird et al., 2017 [4]</b>                 | Does not focus on communication.                      |
| <b>Black et al., 2002 [5]</b>                | Not published between 2007 and 2018.                  |
| <b>de Casadevante et al., 2015 [6]</b>       | Does not focus on communication.                      |
| <b>Coles et al., 2015 [7]</b>                | Does not focus on communication.                      |
| <b>Corcoran et al., 2014 [8]</b>             | Does not focus on communication.                      |
| <b>Drolet et al., 2015 [9]</b>               | Does not focus on communication.                      |
| <b>Finocchiaro-Kessler et al., 2016 [10]</b> | Does not focus on HPV vaccination.                    |
| <b>Fisher et al., 2013 [11]</b>              | Does not focus on communication.                      |
| <b>Gallagher et al., 2016 [12]</b>           | Does not focus on communication.                      |
| <b>Garcini et al., 2012 [13]</b>             | Does not focus on communication.                      |
| <b>Han et al., 2011 [14]</b>                 | Does not focus on HPV vaccination.                    |
| <b>Islam et al., 2017 [15]</b>               | Does not focus on HPV vaccination.                    |
| <b>Jarrett et al., 2015 [16]</b>             | Results not specific to HPV vaccination.              |
| <b>Kasting et al., 2016 [17]</b>             | Does not focus on communication.                      |
| <b>Kasting et al., 2016 [18]</b>             | Does not focus on communication.                      |
| <b>Katz et al., 2010 [19]</b>                | Does not have a “Methods” section.                    |
| <b>Kaufman et al., 2013 [20]</b>             | Does not focus on HPV vaccination.                    |
| <b>Macki et al., 2016 [21]</b>               | Does not focus on HPV vaccination.                    |
| <b>Madhivanan et al., 2016 [22]</b>          | Does not focus on communication.                      |
| <b>Marlow, 2011 [23]</b>                     | Does not focus on communication.                      |
| <b>Maver et al., 2017 [24]</b>               | Does not focus on communication.                      |
| <b>Newman et al., 2012 [25]</b>              | Duplicate.                                            |
| <b>Nadarzynski et al., 2014 [26]</b>         | Participants >26 years old.                           |
| <b>Patel et al., 2016 [27]</b>               | Does not focus on communication.                      |
| <b>Posadzki et al., 2016 [28]</b>            | Does not focus on HPV vaccination.                    |
| <b>Prue et al., 2016 [29]</b>                | Does not focus on communication.                      |
| <b>Rambout et al., 2012 [30]</b>             | Duplicate.                                            |
| <b>Ratanasiripong, 2012 [31]</b>             | Does not focus on communication.                      |
| <b>Santhanes et al., 2018 [32]</b>           | Does not focus on communication.                      |
| <b>Stone et al., 2002 [33]</b>               | Not published between 2007 and 2018.                  |
| <b>Trim et al., 2012 [34]</b>                | Does not focus on communication.                      |
| <b>Zhang et al., 2016 [35]</b>               | Does not focus on communication.                      |

1. Andrade CJCd. Economic evaluations of the use of a vaccine against human papillomavirus (HPV) in adolescent girls: a systematic review. 2010:123-.
2. Baroy J, Chung D, Frisch R, Apgar D, Slack MK. The impact of pharmacist immunization programs on adult immunization rates: A systematic review and meta-analysis. *Journal of the American Pharmacists Association : JAPhA*. 2016;56(4):418-26.
3. Ben Hadj Yahia MB, Jouin-Bortolotti A, Dervaux B. Extending the Human Papillomavirus Vaccination Programme to Include Males in High-Income Countries: A Systematic Review of the Cost-Effectiveness Studies. *Clin Drug Investig*. 2015;35(8):471-85.
4. Bird Y, Obidiya O, Mahmood R, Nwankwo C, Moraros J. Human Papillomavirus Vaccination Uptake in Canada: A Systematic Review and Meta-analysis. *Int J Prev Med*. 2017;8:71.
5. Black ME, Yamada J, Mann V. A systematic literature review of the effectiveness of community-based strategies to increase cervical cancer screening. *Can J Public Health*. 2002;93(5):386-93.
6. Fernández de Casadevante V, Gil Cuesta J, Cantarero-Arévalo L. Determinants in the Uptake of the Human Papillomavirus Vaccine: A Systematic Review Based on European Studies. *Front Oncol*. 2015;5:141.
7. Coles VA, Patel AS, Allen FL, Keeping ST, Carroll SM. The association of human papillomavirus vaccination with sexual behaviours and human papillomavirus knowledge: a systematic review. *Int J STD AIDS*. 2015;26(11):777-88.
8. Corcoran J, Crowley M. Latinas' attitudes about cervical cancer prevention: a meta-synthesis. *J Cult Divers*. 2014;21(1):15-21.
9. Drolet M, Bénard É, Boily M-C, Ali H, Baandrup L, Bauer H, et al. Population-level impact and herd effects following human papillomavirus vaccination programmes: a systematic review and meta-analysis. *The Lancet Infectious Diseases*. 2015;15(5):565-80.

10. Finocchario-Kessler S, Wexler C, Maloba M, Mabachi N, Ndikum-Moffor F, Bukusi E. Cervical cancer prevention and treatment research in Africa: a systematic review from a public health perspective. *BMC Womens Health*. 2016;16(1):29.
11. Fisher H, Trotter CL, Audrey S, MacDonald-Wallis K, Hickman M. Inequalities in the uptake of human papillomavirus vaccination: a systematic review and meta-analysis. *Int J Epidemiol*. 2013;42(3):896-908.
12. Gallagher KE, Kadokura E, Eckert LO, Miyake S, Mounier-Jack S, Aldea M, et al. Factors influencing completion of multi-dose vaccine schedules in adolescents: a systematic review. *BMC Public Health*. 2016;16:172.
13. Garcini LM, Galvan T, Barnack-Tavlaris JL. The study of human papillomavirus (HPV) vaccine uptake from a parental perspective: a systematic review of observational studies in the United States. *Vaccine*. 2012;30(31):4588-95.
14. Han HR, Kim J, Lee JE, Hedlin HK, Song H, Song Y, et al. Interventions that increase use of Pap tests among ethnic minority women: a meta-analysis. *Psychooncology*. 2011;20(4):341-51.
15. Islam RM, Billah B, Hossain MN, Oldroyd J. Barriers to Cervical Cancer and Breast Cancer Screening Uptake in Low-Income and Middle-Income Countries: A Systematic Review. *Asian Pacific journal of cancer prevention : APJCP*. 2017;18(7):1751-63.
16. Jarrett C, Wilson R, O'Leary M, Eckersberger E, Larson HJ, Hesitancy SWGoV. Strategies for addressing vaccine hesitancy - A systematic review. *Vaccine*. 2015;33(34):4180-90.
17. Kasting ML, Shapiro GK, Rosberger Z, Kahn JA, Zimet GD. Tempest in a Teapot: A Systematic Review of HPV Vaccination and Risk Compensation Research. *Hum Vaccin Immunother*. 2016;12(6):0.
18. Kasting M, Shapiro G, Rosberger Z, Kahn J, Zimet G. Does HPV vaccination impact sexual behaviour? A systematic literature review. *Psychooncology*. 2016:159.

19. Katz IT, Ware NC, Gray G, Haberer JE, Mellins CA, Bangsberg DR. Scaling up human papillomavirus vaccination: a conceptual framework of vaccine adherence. *Sexual health*. 2010;7(3):279-86.
20. Kaufman J, Synnot A, Ryan R, Hill S, Horey D, Willis N, et al. Face to face interventions for informing or educating parents about early childhood vaccination. *Cochrane Database of Systematic Reviews*. 2013;5(5):CD010038.
21. Macki M, Dabaja AA. Literature review of vaccine-related adverse events reported from HPV vaccination in randomized controlled trials. *Basic and clinical andrology*. 2016;26:16.
22. Madhivanan P, Pierre-Victor D, Mukherjee S, Bhoite P, Powell B, Jean-Baptiste N, et al. Human Papillomavirus Vaccination and Sexual Disinhibition in Females: A Systematic Review. *Am J Prev Med*. 2016;51(3):373-83.
23. Marlow LA. HPV vaccination among ethnic minorities in the UK: knowledge, acceptability and attitudes. *Br J Cancer*. 2011;105(4):486-92.
24. Maver PJ, Poljak M. Progress in prophylactic human papillomavirus (HPV) vaccination in 2016: A literature review. *Vaccine*. 2017.
25. Newman PA, Logie C, Asakura K. Meta-analysis of correlates of HPV vaccine acceptability among men: supporting vaccine implementation science. *Retrovirology*. 2012.
26. Nadarzynski T, Smith H, Richardson D, Jones CJ, Llewellyn CD. Human papillomavirus and vaccine-related perceptions among men who have sex with men: a systematic review. *Sex Transm Infect*. 2014;90(7):515-23.
27. Patel H, Jevé YB, Sherman SM, Moss EL. Knowledge of human papillomavirus and the human papillomavirus vaccine in European adolescents: a systematic review. *Sex Transm Infect*. 2016;92(6):474-9.
28. Posadzki P, Mastellos N, Ryan R, Gunn LH, Felix LM, Pappas Y, et al. Automated telephone communication systems for preventive healthcare and management of long-term conditions. *Cochrane Database of Systematic Reviews*. 2016;12:CD009921.

29. Prue G, Shapiro G, Maybin R, Santin O, Lawler M. Knowledge and acceptance of human papillomavirus (HPV) and HPV vaccination in adolescent boys worldwide: A systematic review. *Journal of Cancer Policy*. 2016;10:1-15.
30. Rambout L, Tashkandi M, Hopkins L, Tricco AC. Self-reported barriers and facilitators to preventive hpv vaccination among adolescent girls and young women: A systematic review. *Int J Gynecol Cancer*. 2012.
31. Ratanasiripong NT. A review of human papillomavirus (HPV) infection and HPV vaccine-related attitudes and sexual behaviors among college-aged women in the United States. *Journal of American college health : J of ACH*. 2012;60(6):461-70.
32. Santhanes D, Yong CP, Yap YY, Saw PS, Chaiyakunapruk N, Khan TM. Factors influencing intention to obtain the HPV vaccine in South East Asian and Western Pacific regions: A systematic review and meta-analysis. *Sci Rep*. 2018;8(1):3640.
33. Stone EG, Morton SC, Hulscher ME, Maglione MA, Roth EA, Grimshaw JM, et al. Interventions that increase use of adult immunization and cancer screening services: a meta-analysis. *Ann Intern Med*. 2002;136(9):641-51.
34. Trim K, Nagji N, Elit L, Roy K. Parental Knowledge, Attitudes, and Behaviours towards Human Papillomavirus Vaccination for Their Children: A Systematic Review from 2001 to 2011. *Obstet Gynecol Int*. 2012;2012:921236.
35. Zhang Y, Wang Y, Liu L, Fan Y, Liu Z, Wang Y, et al. Awareness and knowledge about human papillomavirus vaccination and its acceptance in China: a meta-analysis of 58 observational studies. *BMC Public Health*. 2016;16:216.
