# Supplementary material for: Communication around HPV vaccination for adolescents in low- and middle-income countries: a systematic scoping overview of systematic reviews
Source: PubMed Central journal article supplement (PMC6670236; doi:10.1186/s13643-019-1100-y), 2019-08-01
Supplement: 13643_2019_1100_MOESM6_ESM.pdf [file 13643_2019_1100_MOESM6_ESM.pdf]

Additional file 6: List of reviews excluded where no full-text was available

| <b>Review</b>                  | <b>Reason for exclusion</b>                       |
|--------------------------------|---------------------------------------------------|
| <b>Adedoyin, 2014 [1]</b>      | No full-text available.                           |
| <b>Fernandez, 2016 [2]</b>     | No full-text available – poster abstract.         |
| <b>Kiekenbush, 2012 [3]</b>    | No full-text available.                           |
| <b>Kuk et al., 2015 [4]</b>    | No full-text available – only abstract available. |
| <b>Wilson et al., 2015 [5]</b> | No full-text available – only abstract available. |

1. Adedoyin ACA. A systematic review of evidence-based cancer education media interventions to improve cancer screening behaviors among African Americans in the United States. *Dissertation Abstracts International Section A: Humanities and Social Sciences*. 2014;75(6-A(E)).
2. Fernandez M. Perceptions of the HPV vaccine among U.S. Hispanic females: A theory-guided systematic review. *Sex Transm Dis*. 2016:S161.
3. Kiekenbush C. The human papillomavirus vaccine: A systematic review elucidating the dynamics of ethical concerns and public health policies. *Journal of the American Society of Cytopathology*. 2012.
4. Kuk N, To J, McBride C, Hong A, Ng E, Li N, et al. Systematic review: Does a positive human papillomavirus vaccination status increase the risk of unsafe sexual health practice in Australian women? *Sex Transm Infect*. 2015.
5. Wilson AR, Hashibe M, Gren LH, Chou C-C, Gardener AT, Greenwood J, et al. Factors predicting human papillomavirus vaccination intention and uptake: A meta-analysis and systematic review. *Pharmacoepidemiol Drug Saf*. 2015.
